# Supplementary material
Source: publisher figshare collection journal article supplement (https://tandf.figshare.com/articles/dataset/_/3837813)
Supplement: Supplementary file 1 [file 1]

# The Changing Nature of Canada's Parks

Potential Futures for the Athabasca Glacier in 2050

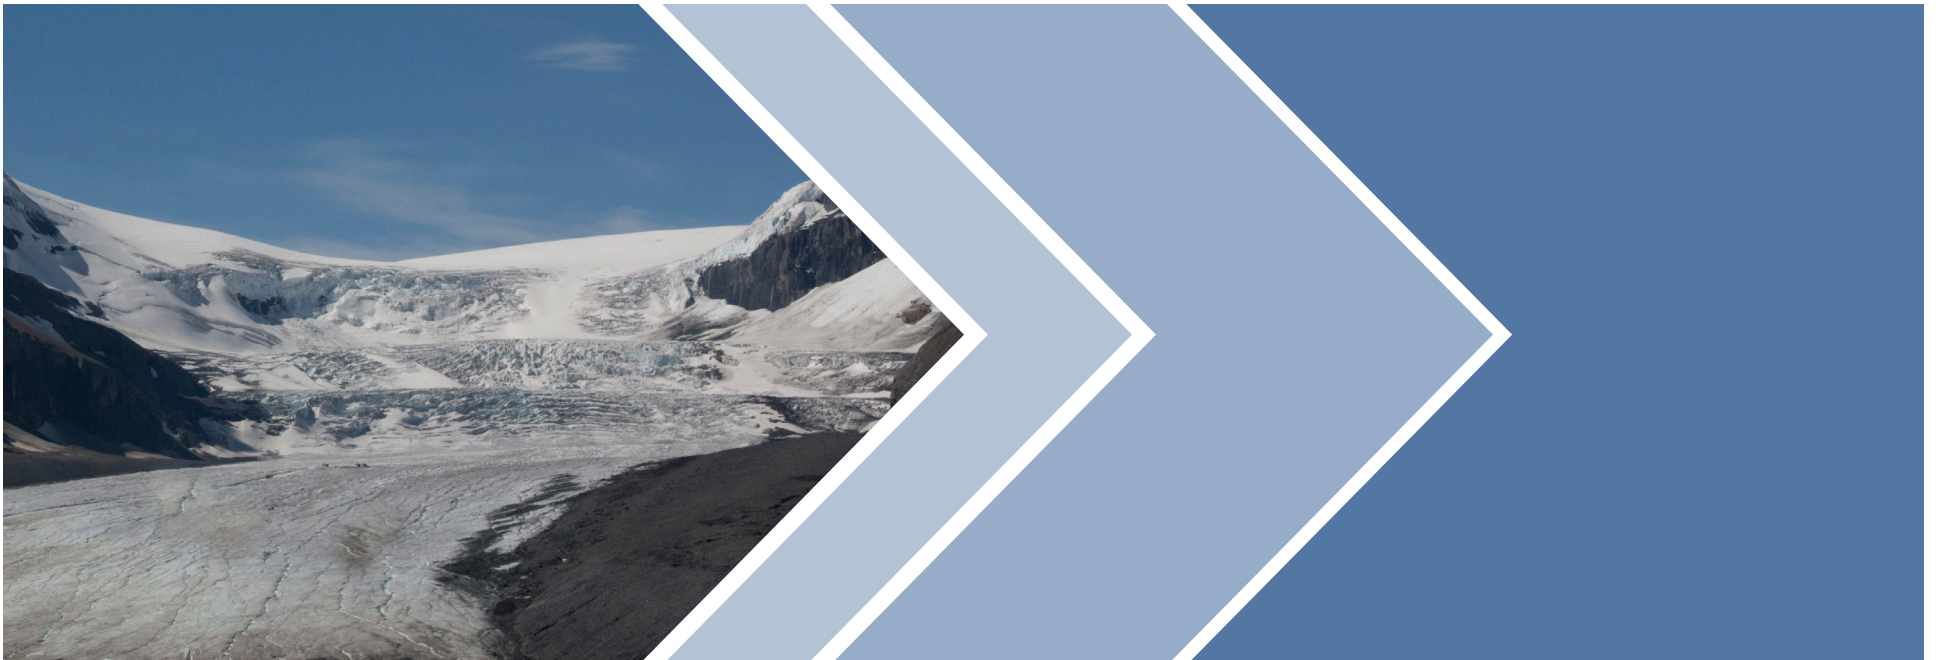



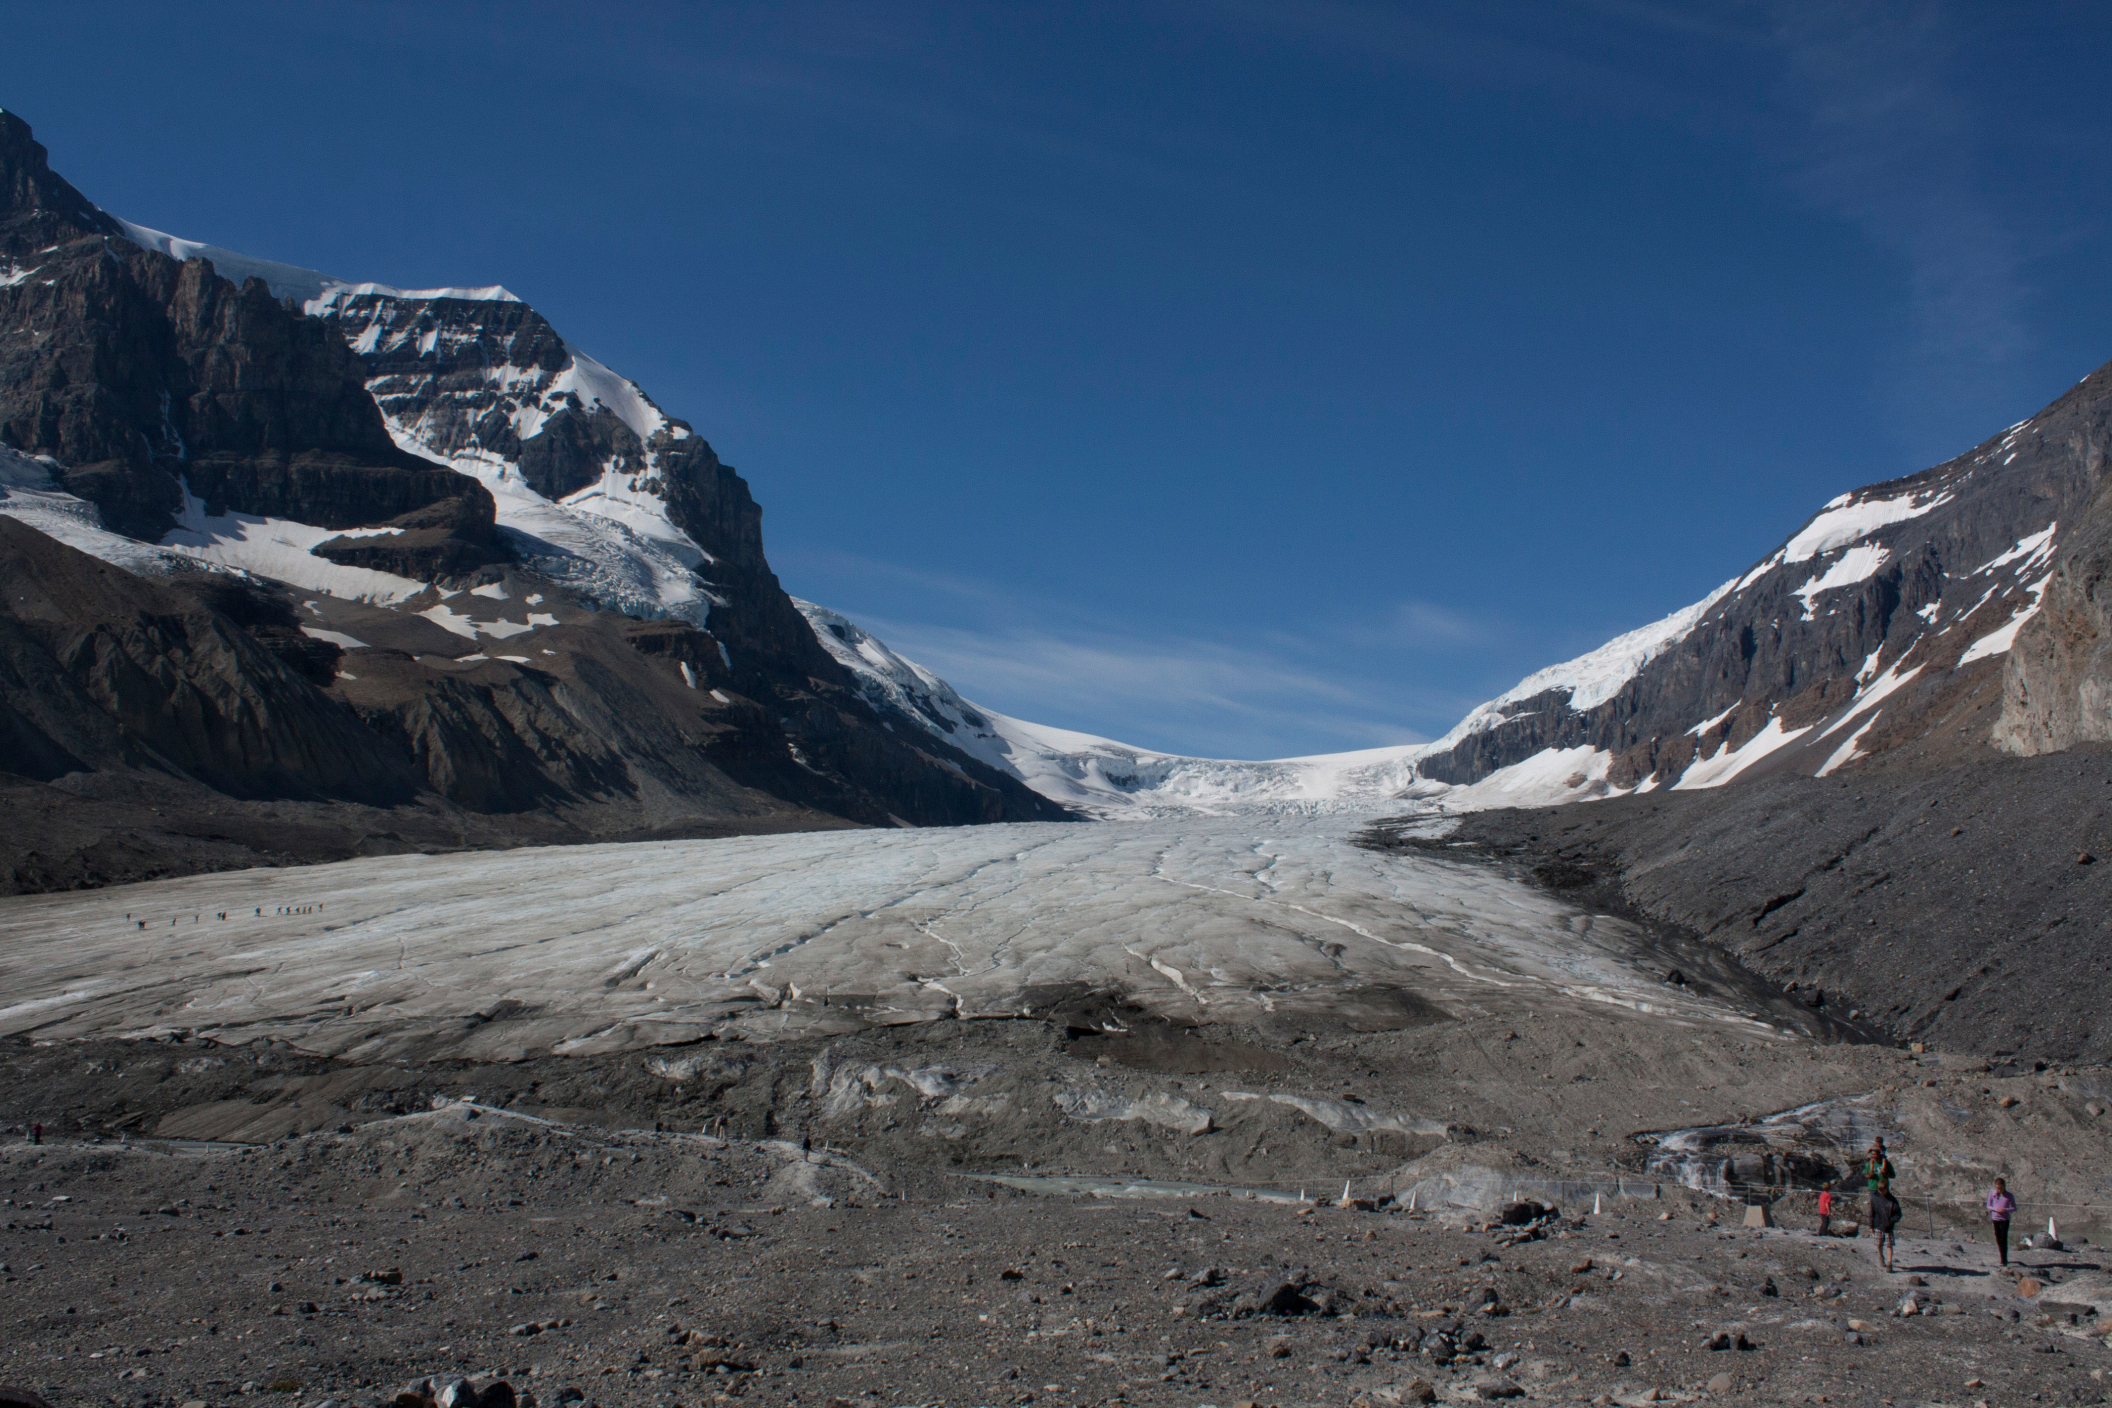

Viewpoint 1 Existing Conditions



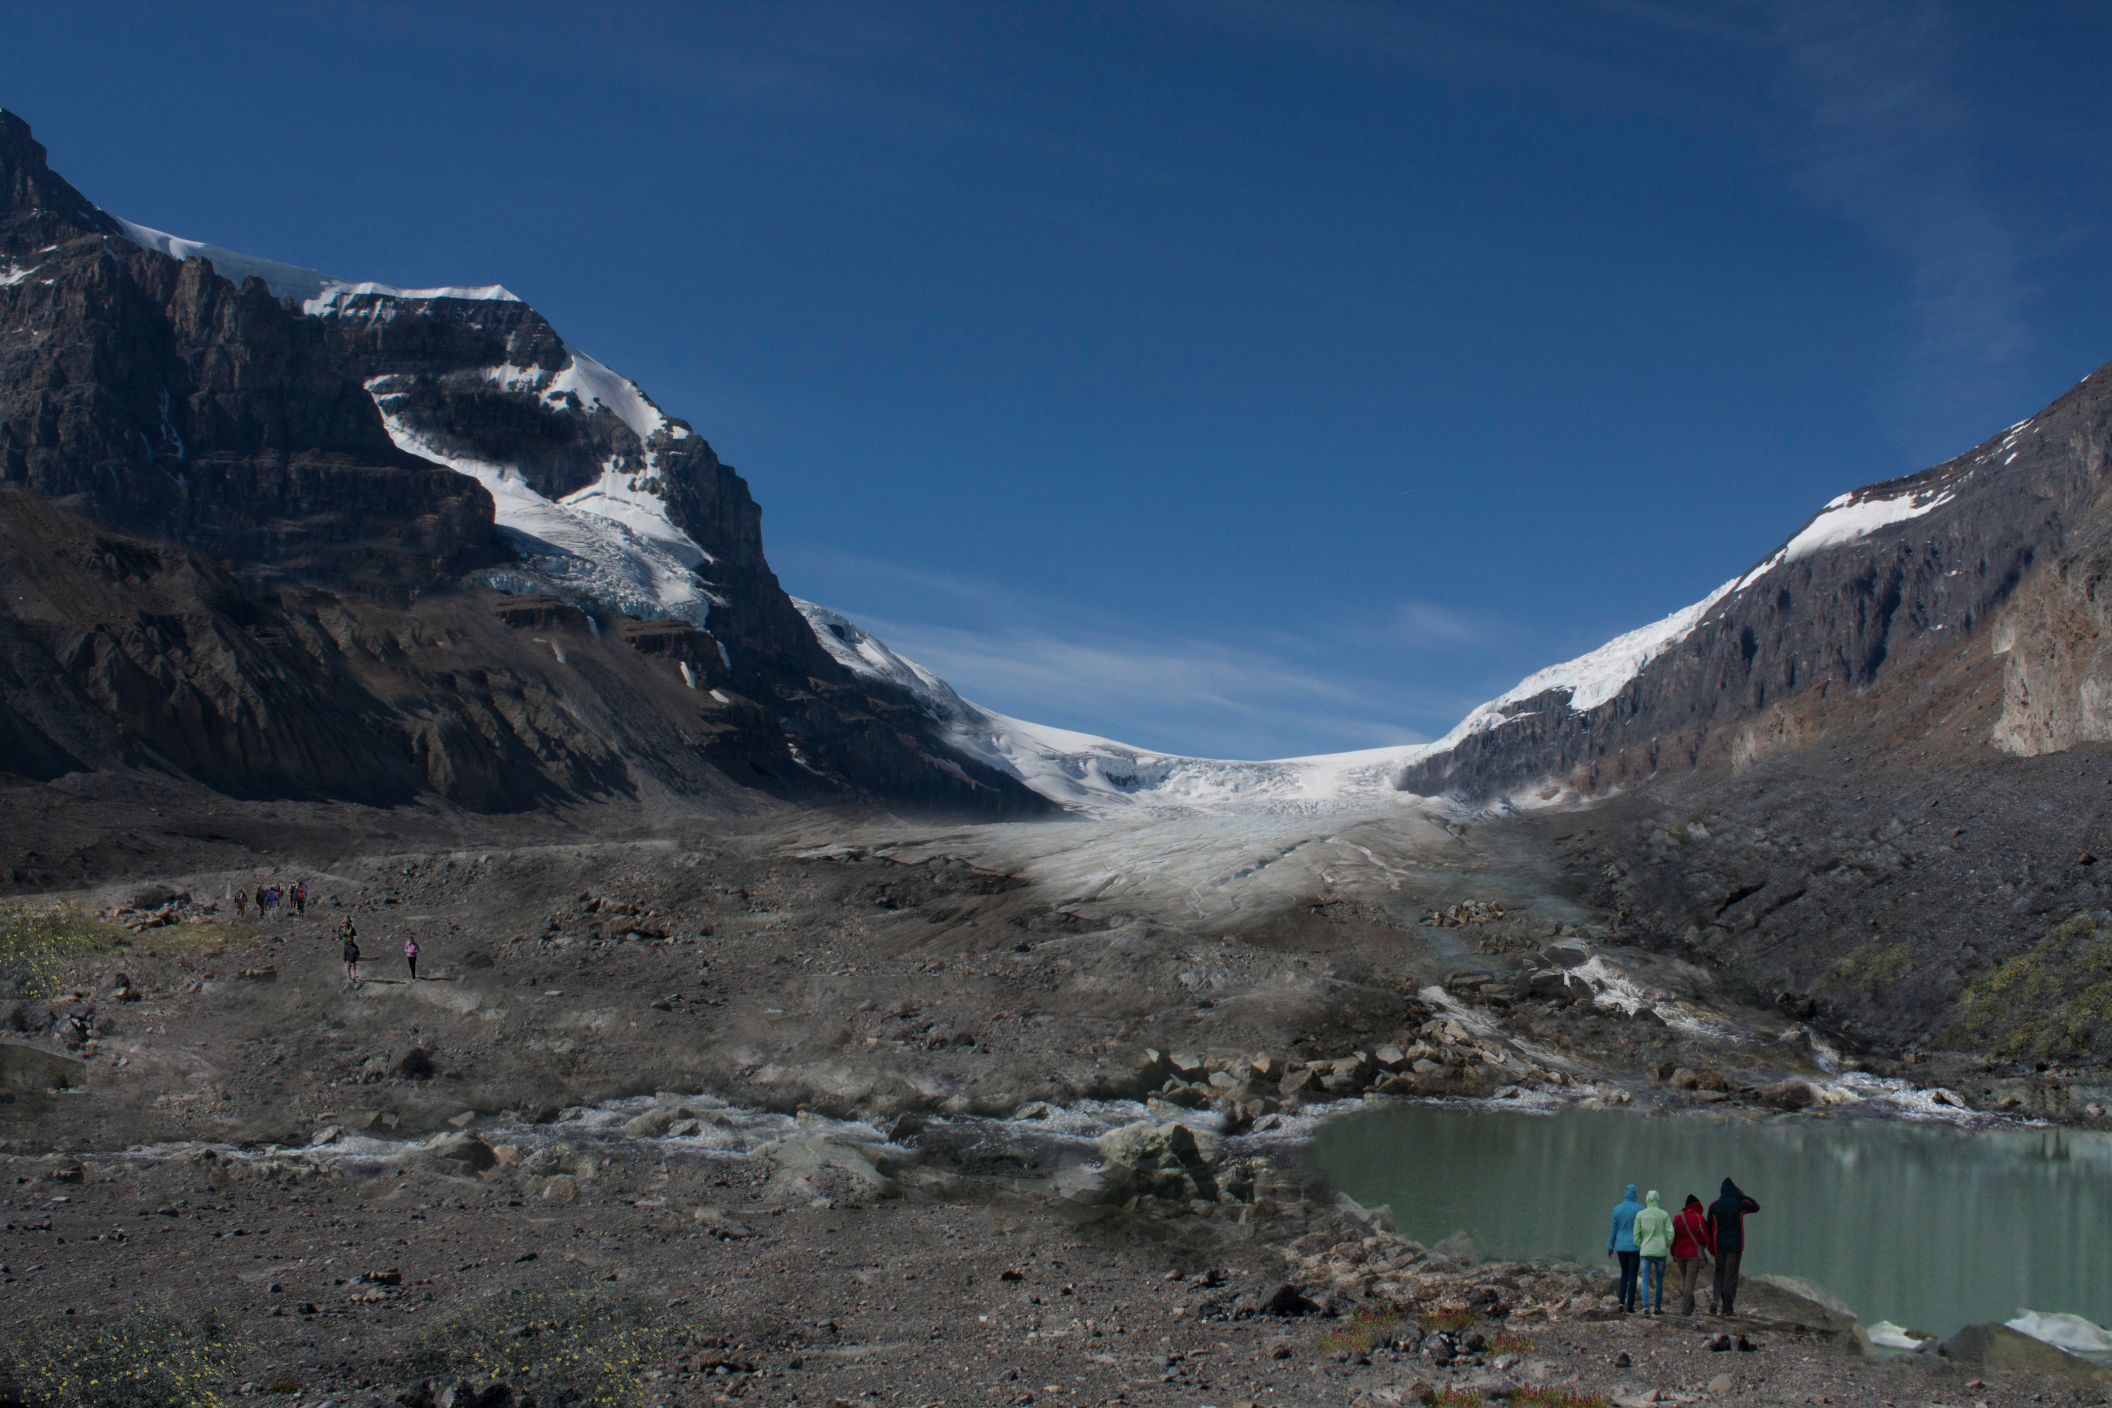

Viewpoint 1 Impacts



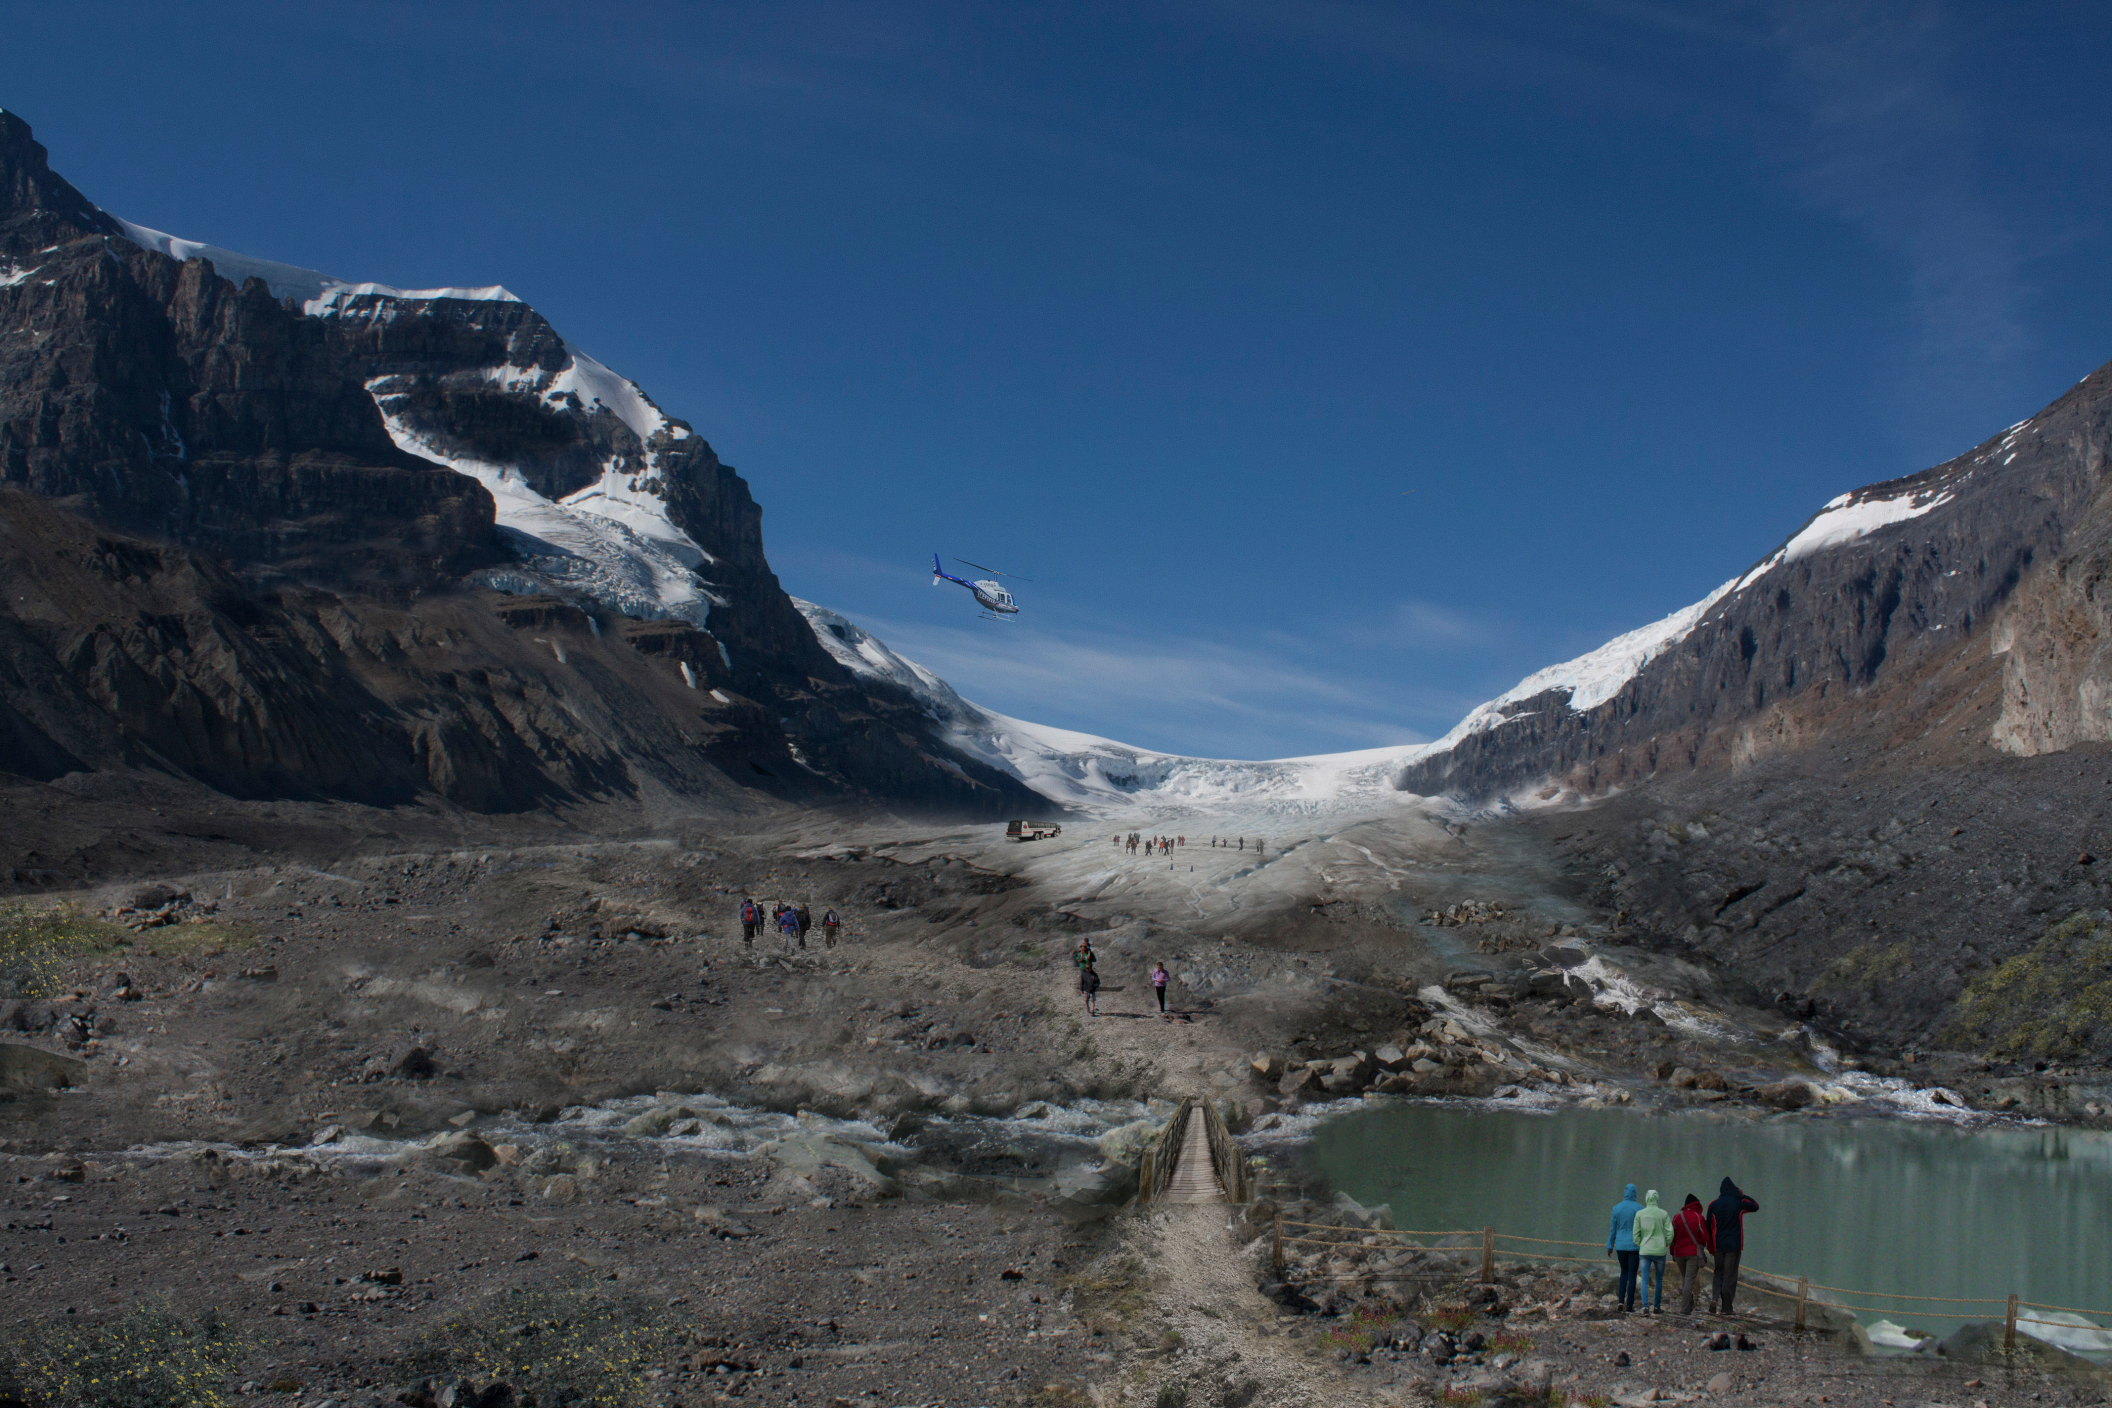

## Viewpoint 1 Impacts and Adaptations



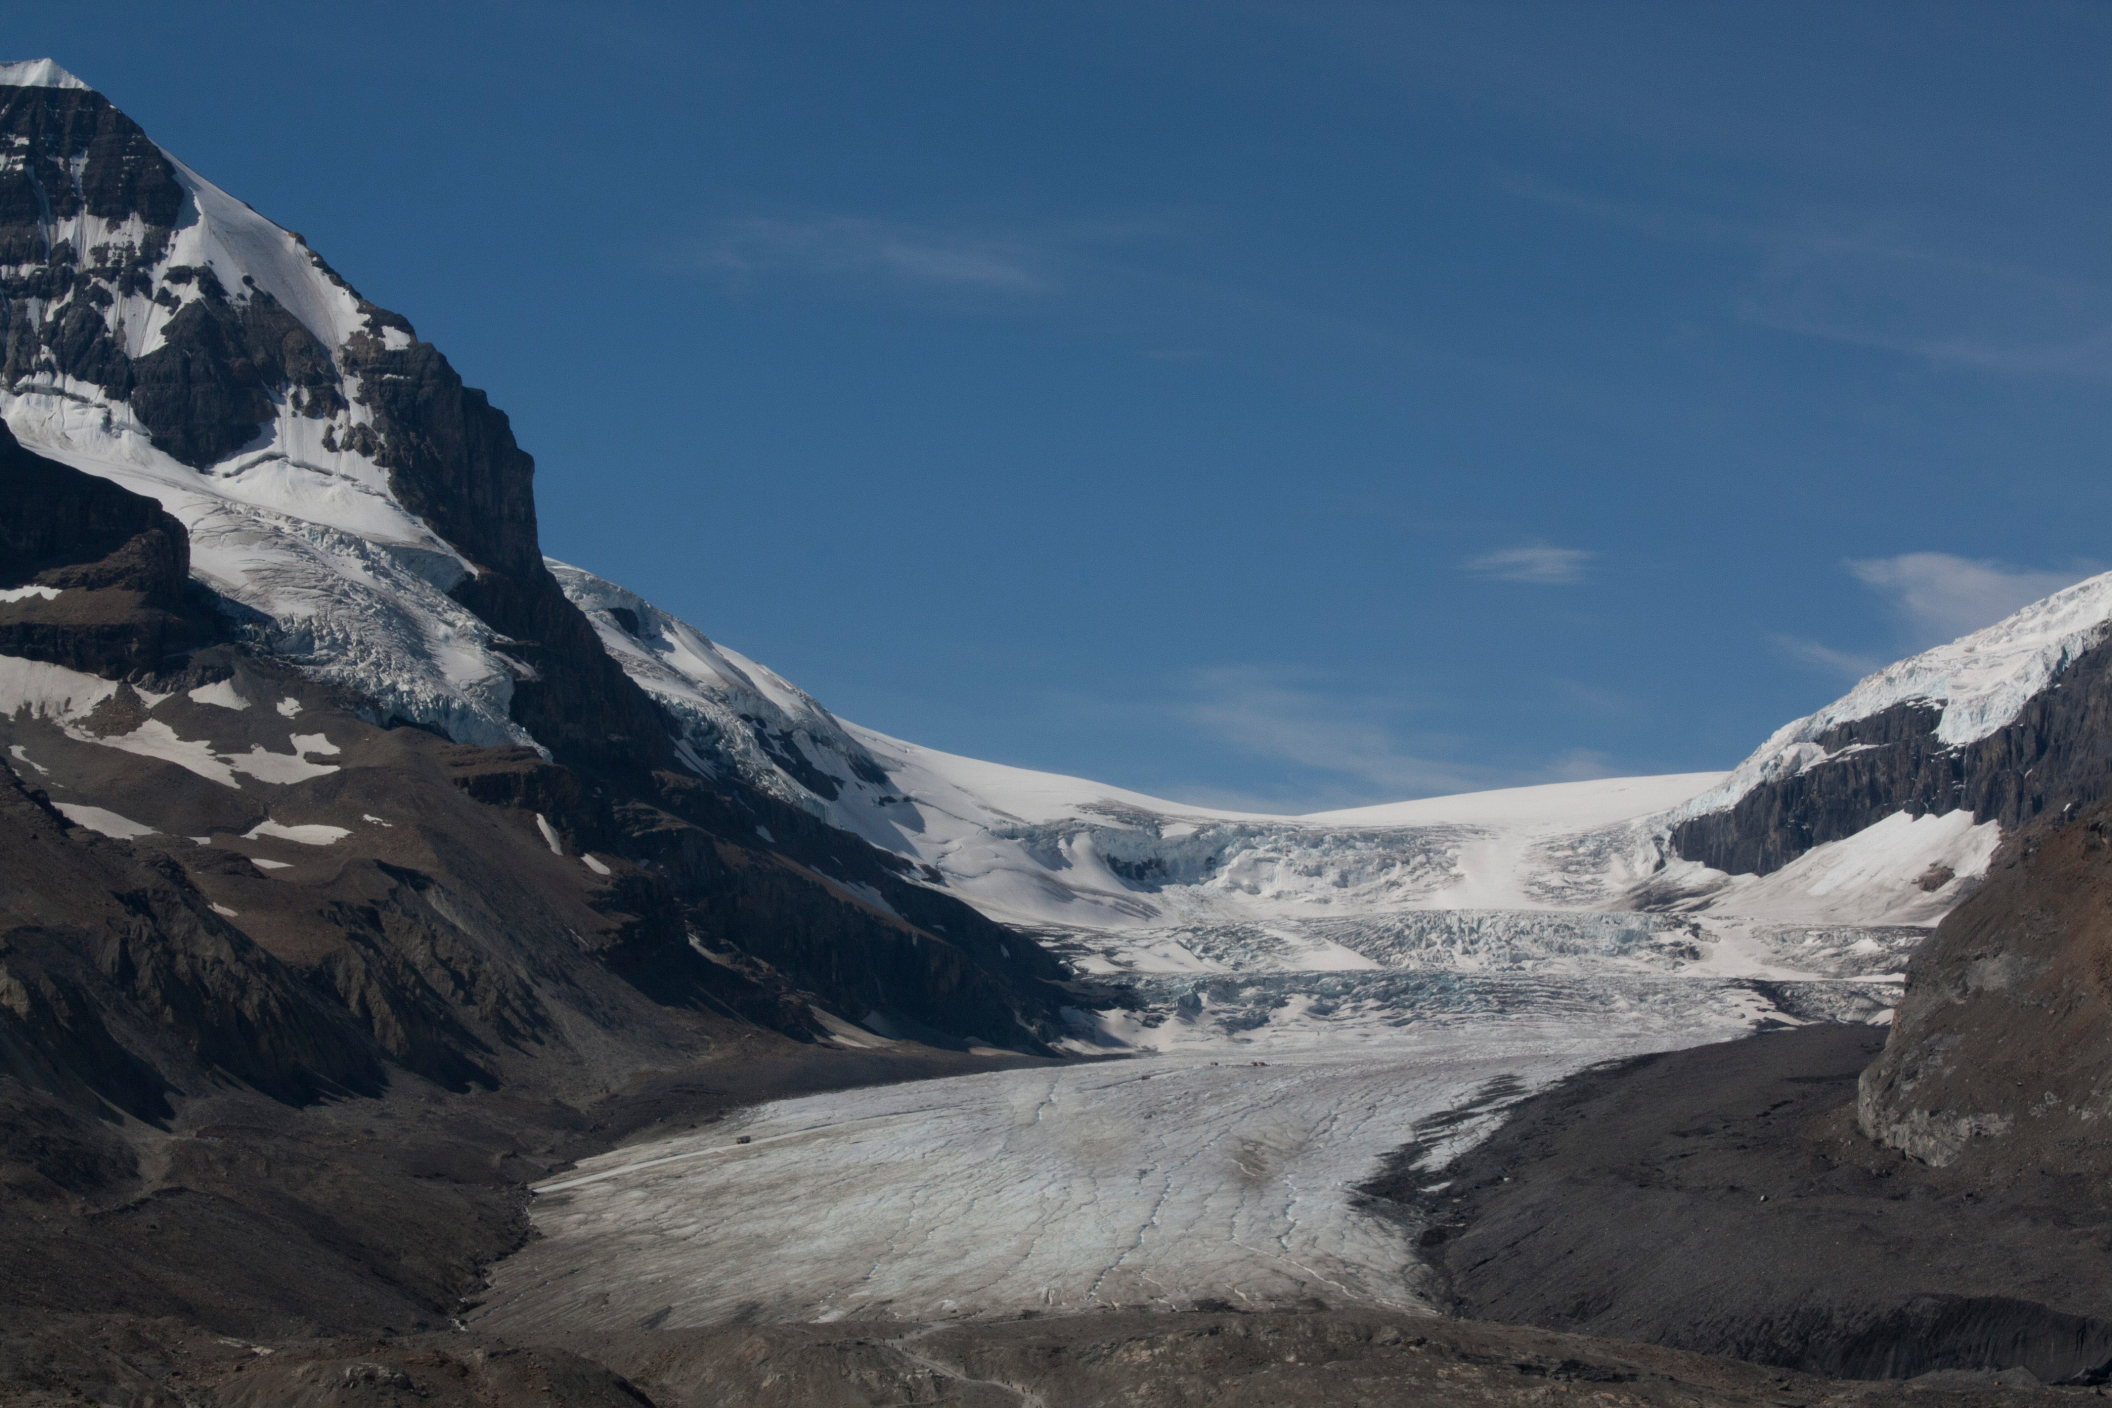

Viewpoint 2 Existing Conditions



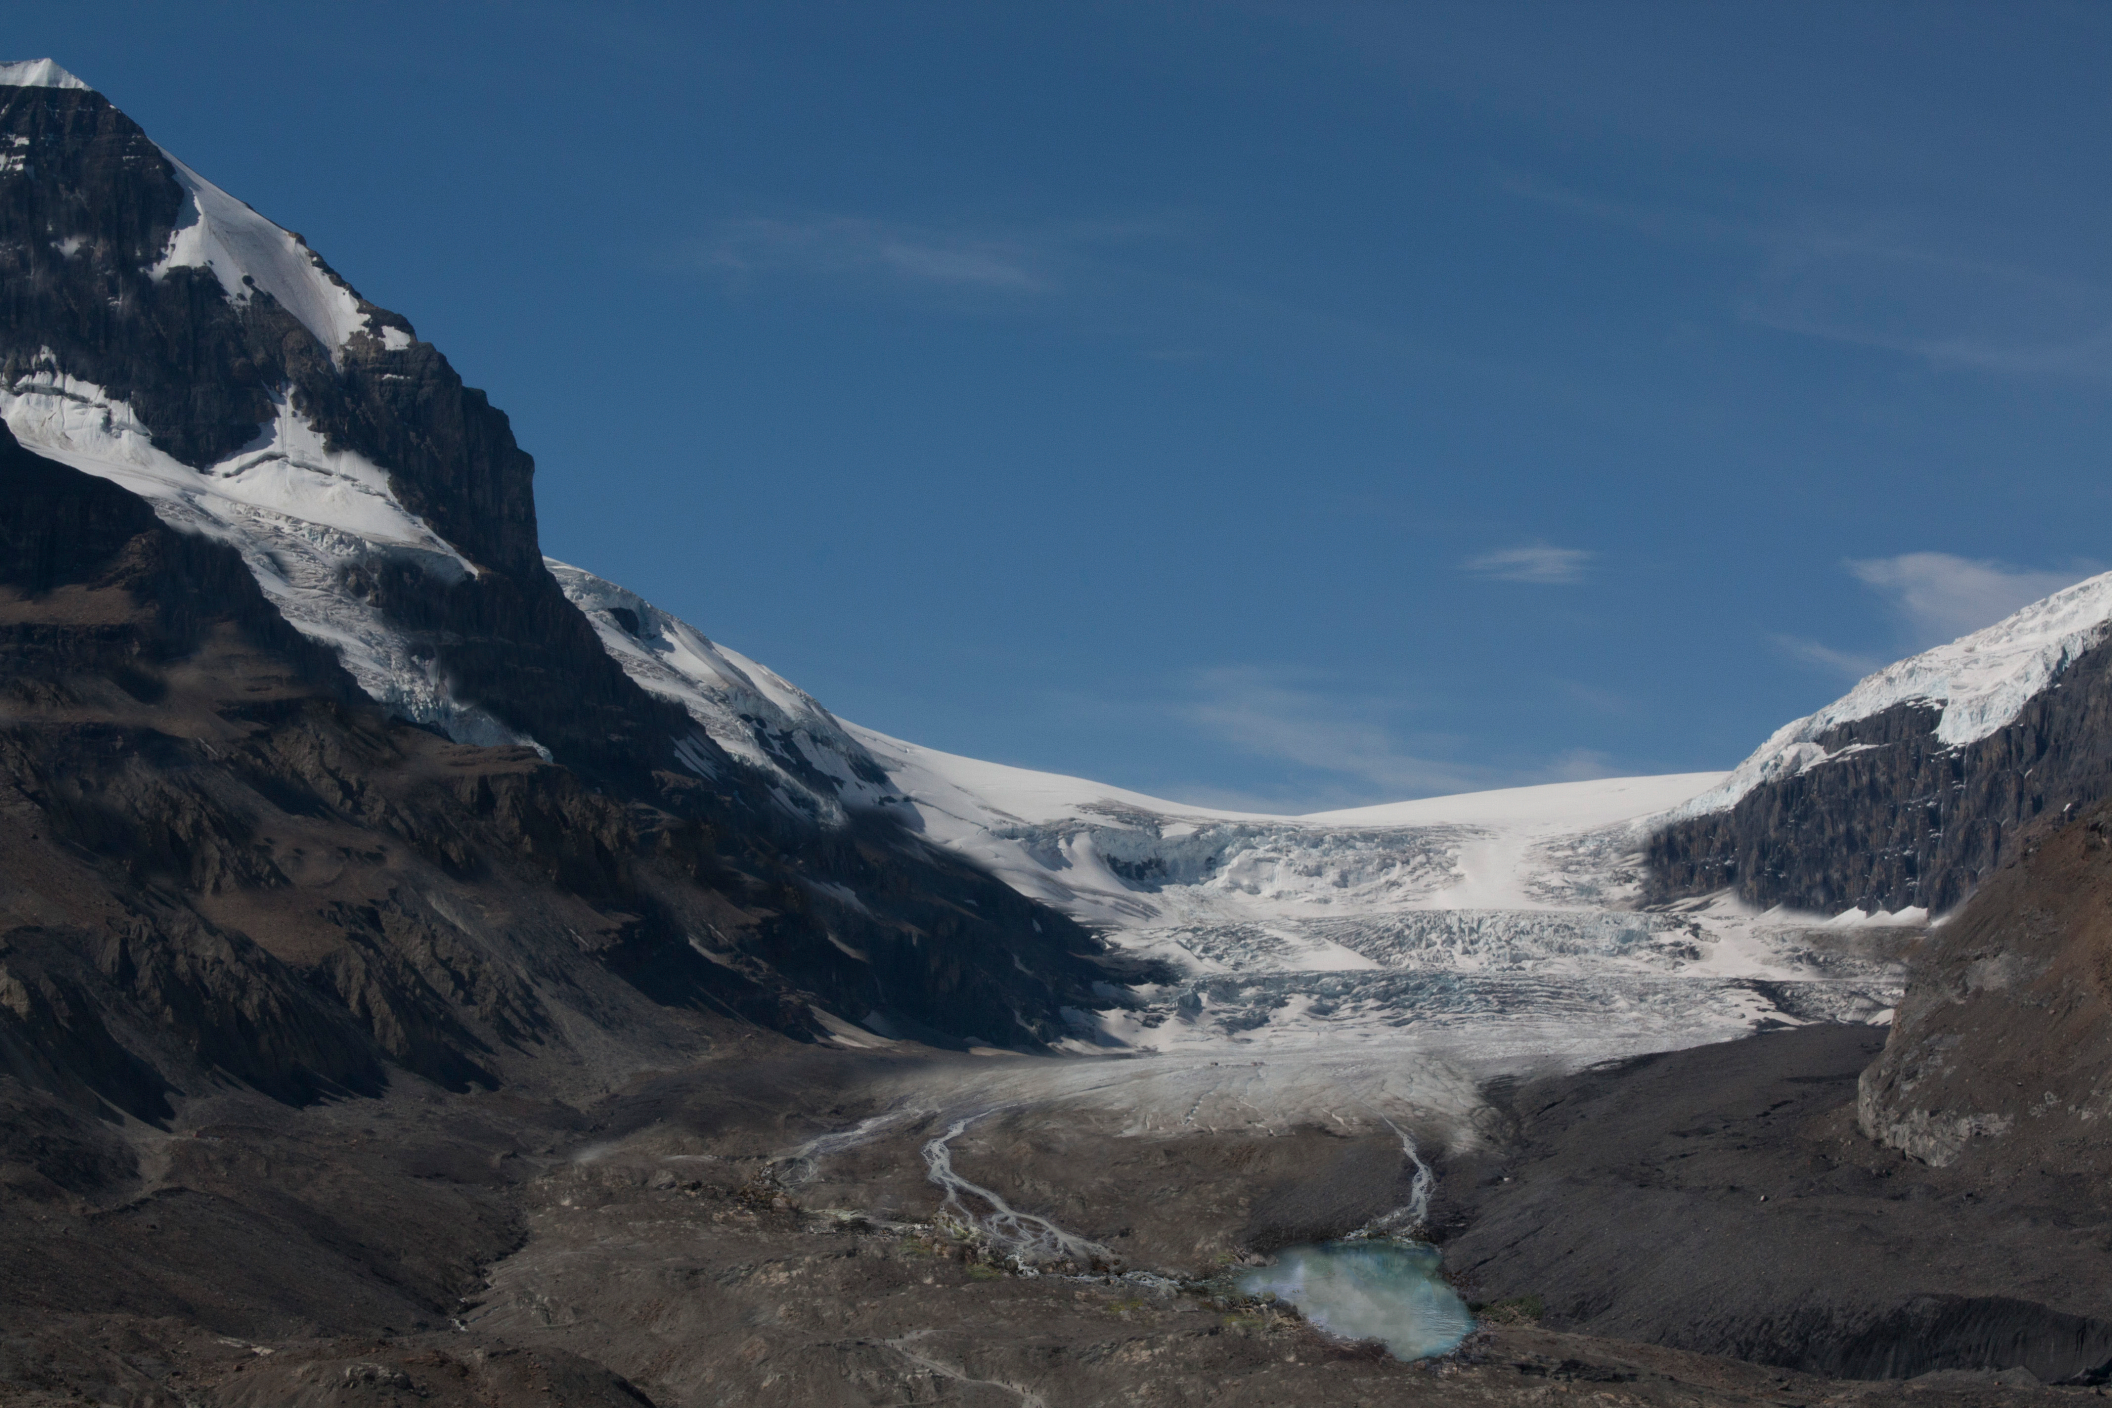

Viewpoint 2 Impacts



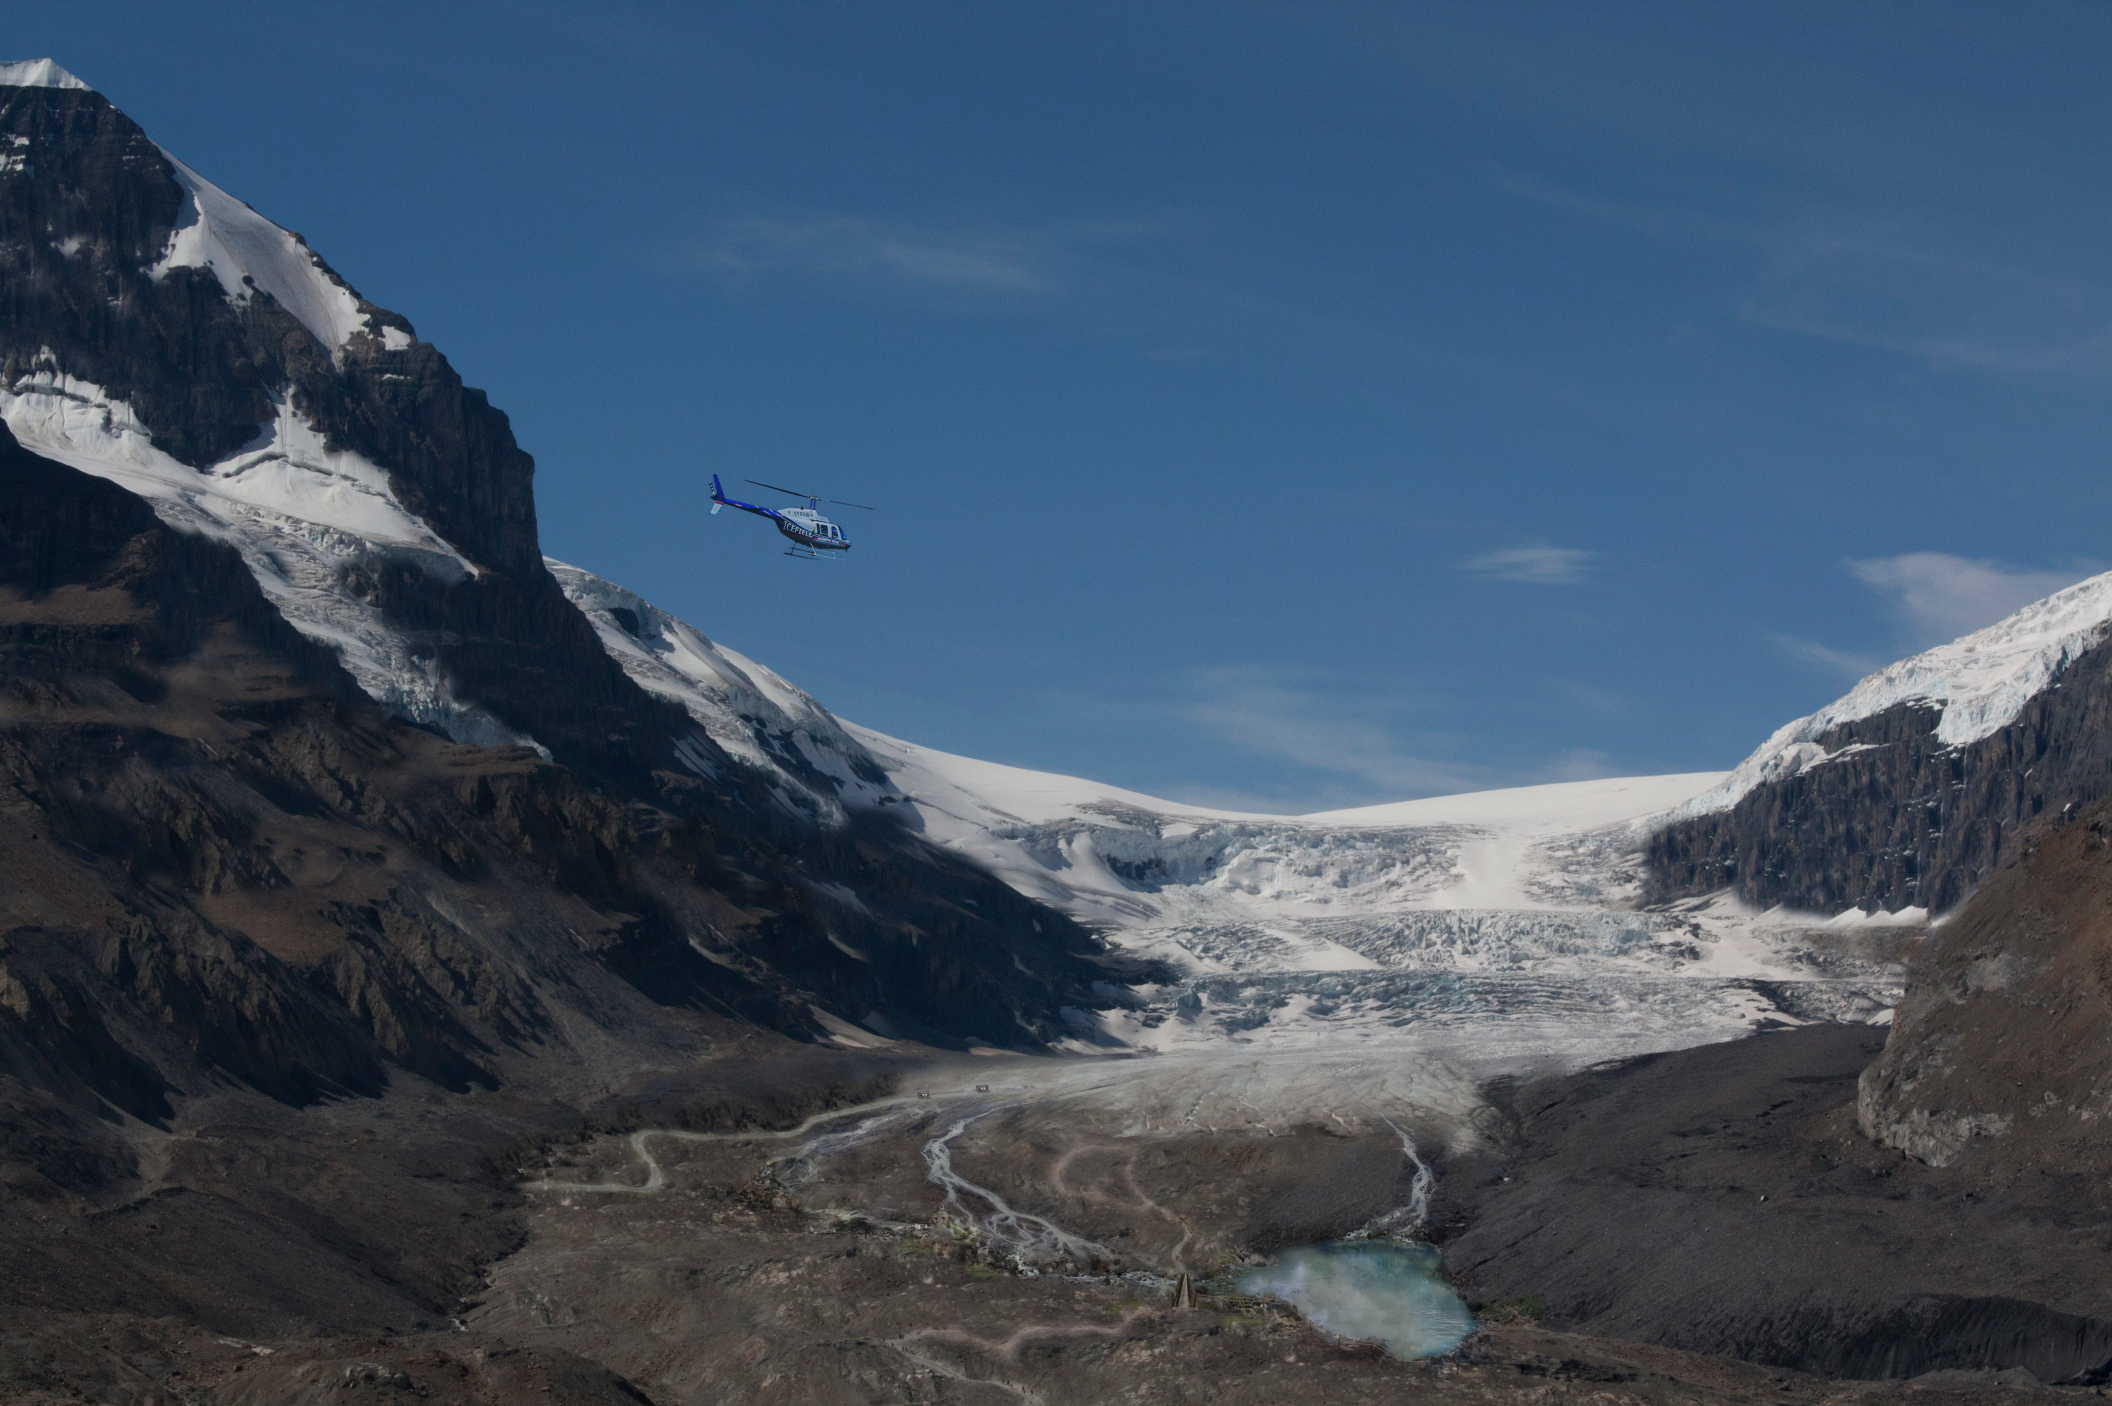

## Viewpoint 2 Impacts and Adaptations
